# Supplementary material
Source: publisher site journal article supplement (https://www.spandidos-publications.com/2918/downloadSupplementary)

Figure S1. (A) Renal biopsy from a case of MPO-AAV exhibiting predominantly fibrotic crescents (H&E staining; magnification, x200). (B) Renal biopsy from a case of PR3-AAV exhibiting predominantly cellular crescents (H&E staining; magnification, x200). Immunofluorescence staining for IgG in (C) a case of MPO-AAV (magnification, x200) and (D) a case of PR3-AAV demonstrated a paucity of immune deposits in the lesions. IgG immunofluorescence staining in a case of (E) Minimal Change Disease as the negative control and (F) a case of lupus nephritis as the positive control. (G) Electron microscopy analysis of the kidney sections from a case of MPO-AAV exhibiting endothelial cell swelling and the formation of crescents (scale bar, 10  $\mu$ m). (H) Electron microscopy analysis of the kidney sections from a case of PR3-AAV exhibiting thrombotic microangiopathies of the glomerular basement membrane (scale bar, 5  $\mu$ m). AAV, antineutrophil cytoplasmic autoantibody-associated vasculitides; PR3, proteinase 3; MPO, myeloperoxidase.

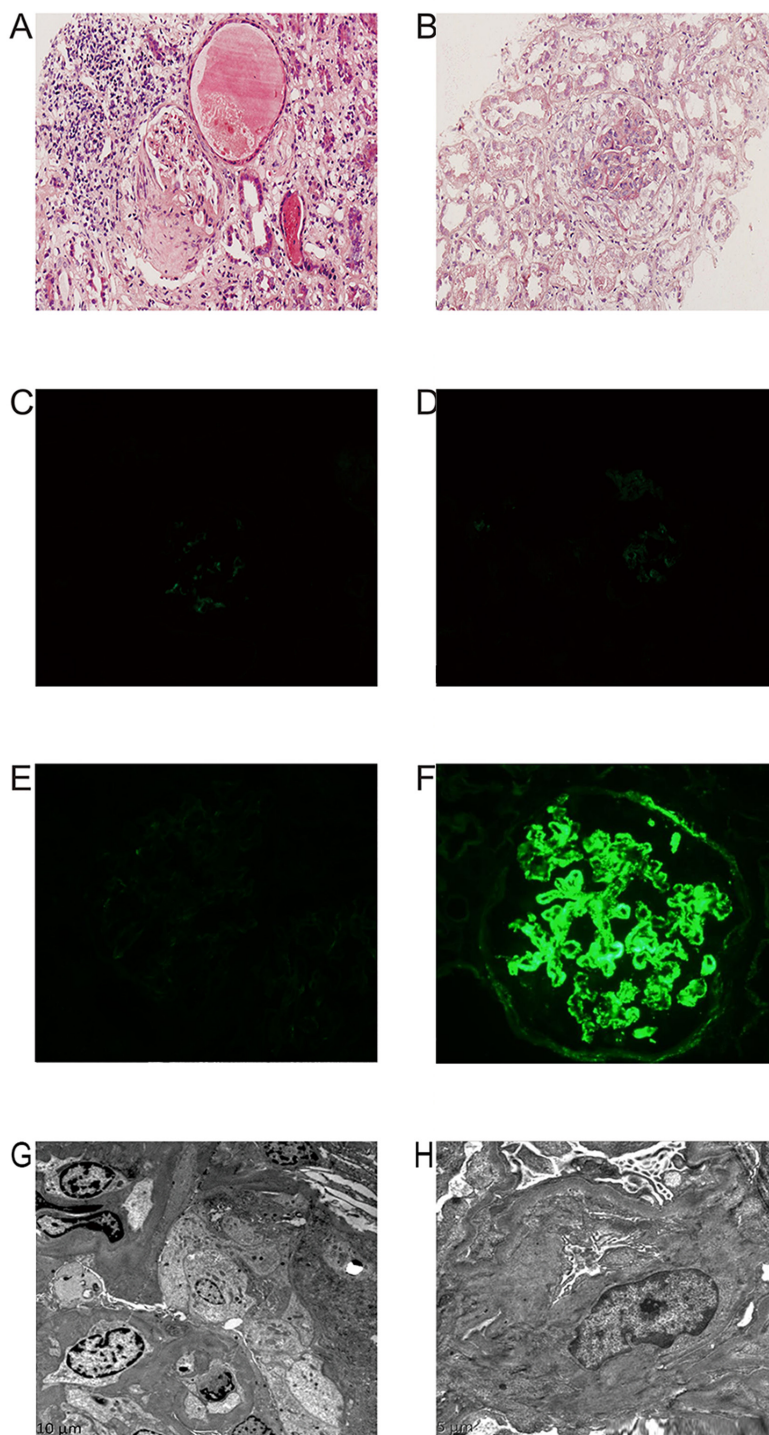

Supplement: Supplementary file 1 [file downloadSupplementary]
